# Supplementary material
Source: PubMed Central journal article supplement (PMC2728118)
Supplement: 97320630003384S1.pdf [file 97320630003384S1.pdf]

## Supplementary material

Equation 1

$$v' = (v - \min_A)(\text{new\_max}_A - \text{new\_min}_A) / (\max_A - \min_A) + \text{new\_min}_A$$

where  $v'$  is the normalized descriptor value,  $v$  is the original descriptor value,  $\max_A$  and  $\min_A$  represent original maxima and minima of concerned descriptor.  $\text{New\_max}_A$  and  $\text{new\_min}_A$  represent maxima and minima defined for normalized descriptor value [16]. Table 1 shows the values of descriptors before and after normalization.

|                   | MW      | LP    | ADE   | PDE    | HBD | HBA   | TPSA  | Ch    | RB  |
|-------------------|---------|-------|-------|--------|-----|-------|-------|-------|-----|
| <b>Original</b>   | 249.354 | 2.58  | -1.44 | -40.22 | 0   | 2     | 41    | 1     | 3   |
| <b>Descriptor</b> | 162.192 | 1.06  | -6.25 | -5.6   | 0   | 2     | 47    | 0     | 3   |
| <b>Vectors</b>    | 152.149 | 0.37  | -1.17 | -46.53 | 0   | 2     | 57    | -1    | 3   |
| <b>Normalized</b> | 0.249   | 0.483 | 0.382 | 0.911  | 0   | 0.067 | 0.228 | 0.5   | 0.1 |
| <b>Descriptor</b> | 0.162   | 0.419 | 0.114 | 0.988  | 0   | 0.067 | 0.261 | 0.333 | 0.1 |
| <b>vectors</b>    | 0.152   | 0.390 | 0.397 | 0.897  | 0   | 0.067 | 0.317 | 0.167 | 0.1 |

**Table 1:** Sample representation of original and normalized descriptor vectors is given.

|                                     | Test data for molecules | TP   | TN   | FP   | FN  | Sensitivity | Specificity | Accuracy |
|-------------------------------------|-------------------------|------|------|------|-----|-------------|-------------|----------|
| Nine descriptor data set            | 20000                   | 9945 | 9280 | 720  | 55  | 99.45%      | 92.80%      | 96.12%   |
| Lipinski's rule descriptor data set | 20000                   | 9045 | 7451 | 2549 | 955 | 90.45%      | 74.51%      | 82.48%   |

**Table 2:** Detailed results of both datasets are given. TP= number of true positives, TN= number of true negatives, FP= number of false positives, FN=number of false negatives
